# Supplementary material
Source: PubMed Central journal article supplement (PMC8505631)
Supplement: 41386_2021_1098_MOESM1_ESM.pdf [file 41386_2021_1098_MOESM1_ESM.pdf]

## Supplementary Figure Legend

Fig. S1: Subpopulations of CD4<sup>+</sup>T lymphocytes of the cannabidiol group compared with the placebo group at baseline (day 2), day 8, week 4 and week 12. Subpopulations of CD4<sup>+</sup>T lymphocytes are presented in column scatter plots. The mean and standard deviation (SD) are expressed with horizontal and vertical bars, respectively. \*Indicates p-value < 0.05. CD, cluster of differentiation; D, day; Tcm, T central memory; Tem, T effector memory; Temra, T effector memory RA; Tn, T naive; W, week.

Fig. S2: Subpopulations of CD8<sup>+</sup>T lymphocytes of the cannabidiol group compared with the placebo group at baseline (day 2), day 8, week 4 and week 12. Subpopulations of CD8<sup>+</sup>T lymphocytes are presented in column scatter plots. The mean and standard deviation (SD) are expressed with horizontal and vertical bars, respectively. \*Indicates p-value < 0.05; \*\*Indicates p-value < 0.01. CD, cluster of differentiation; D, day; Tcm, T central memory; Tem, T effector memory; Temra, T effector memory RA; Tn, T naive; W, week.

Fig. S3: Participants' CBD blood concentrations among treatment groups (adapted with permission from Mongeau-Pérusse et al., 2021(33)). Minimum, 1<sup>st</sup> quartile, median, 3<sup>rd</sup> quartile and maximum values are illustrated with box-whisker plots. Mean and outlier values are illustrated with diamonds and circles, respectively. CBD, cannabidiol; D, day; W, week.

- Placebo
- Cannabidiol

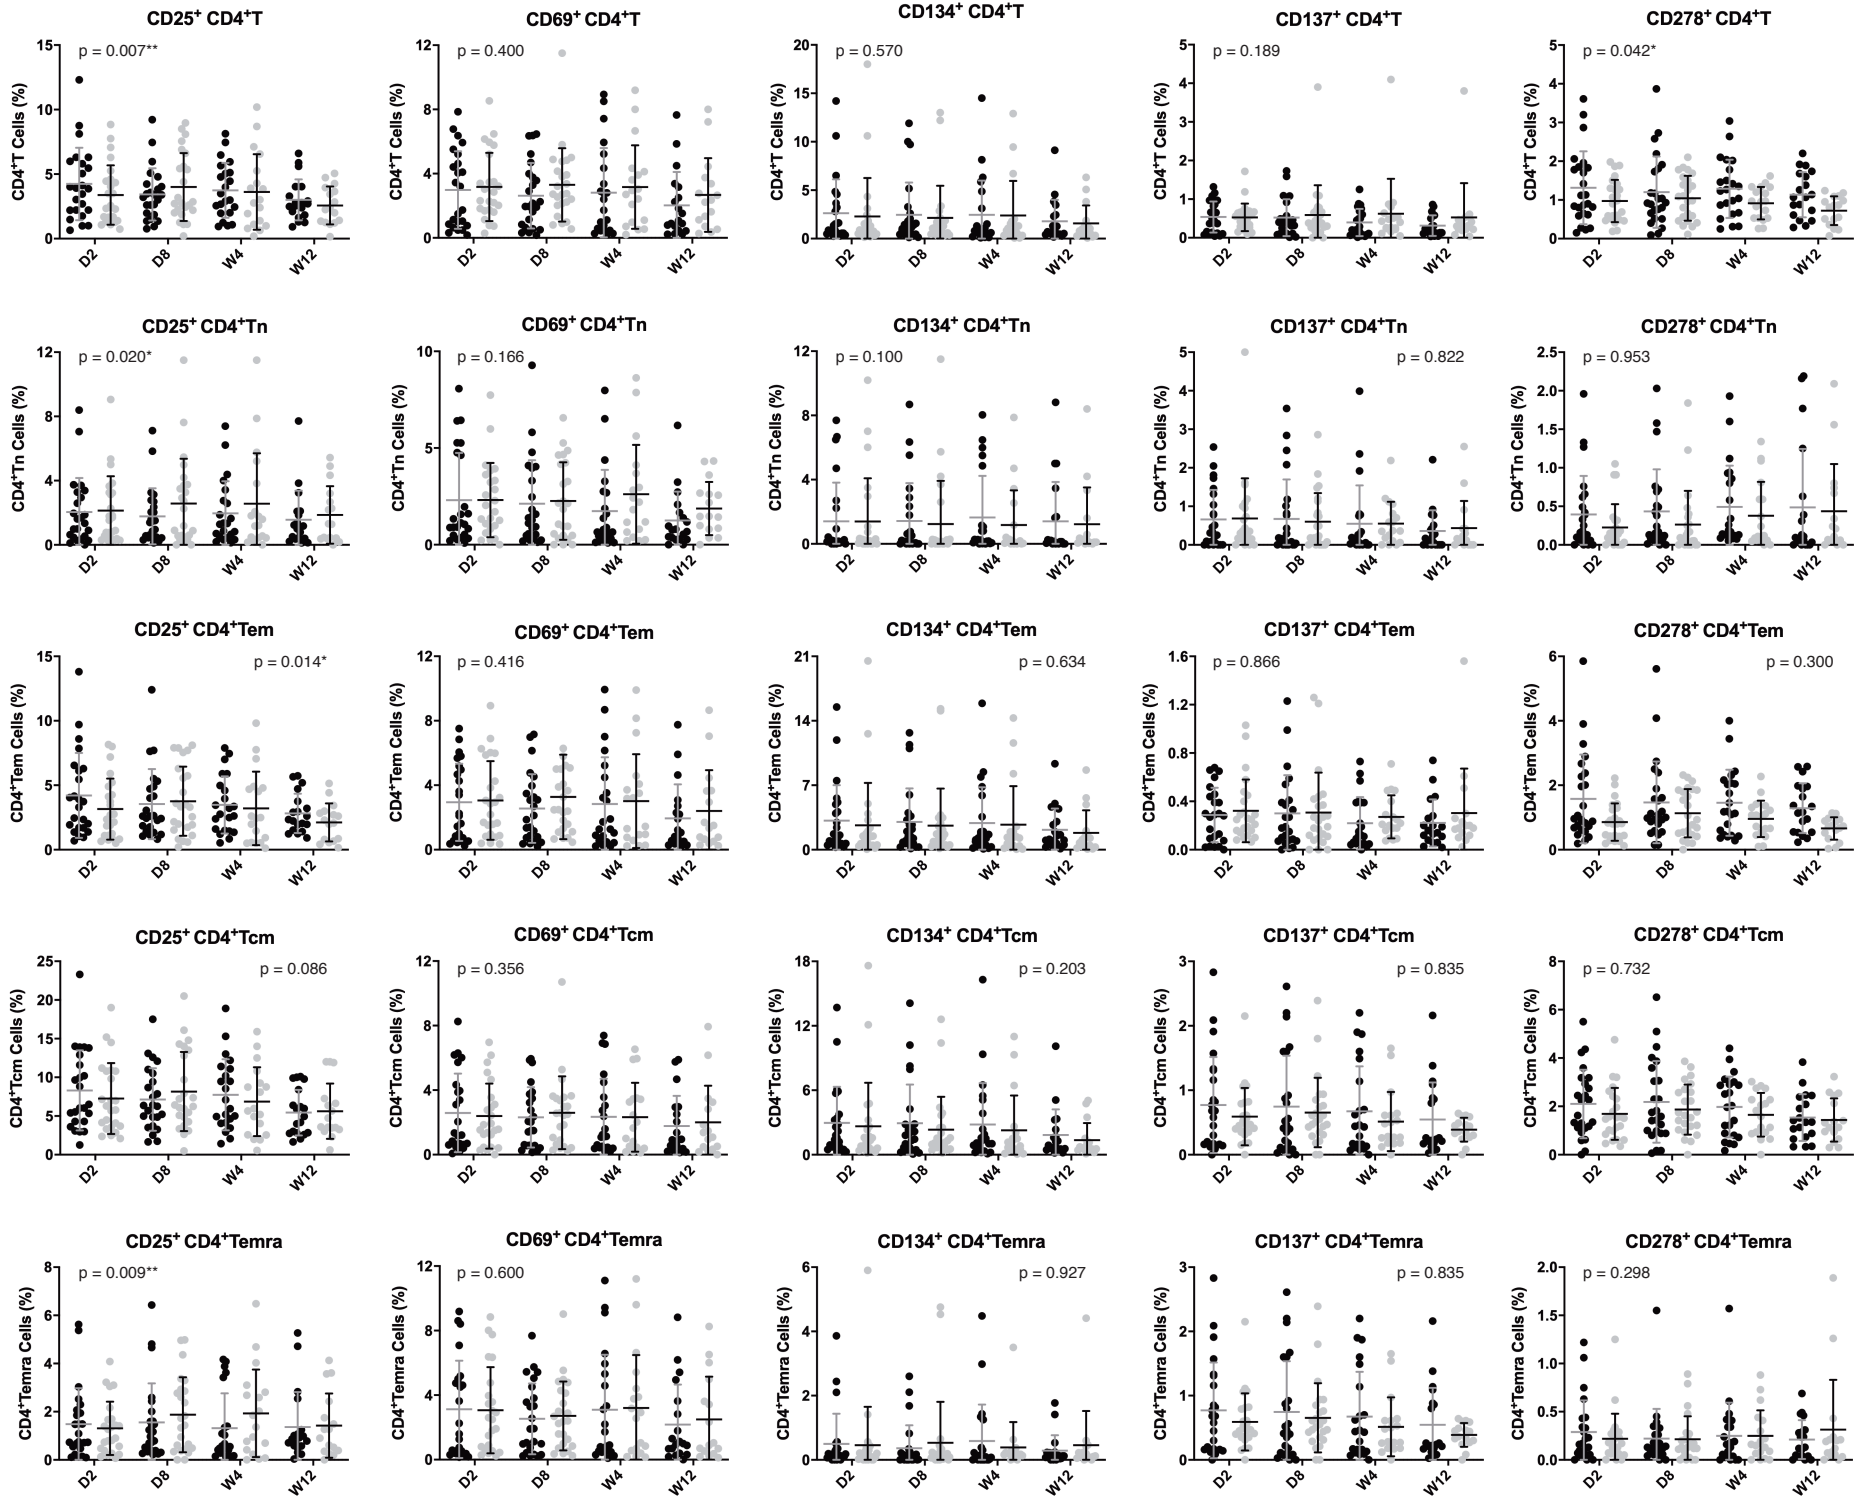

- Placebo
- Cannabidiol

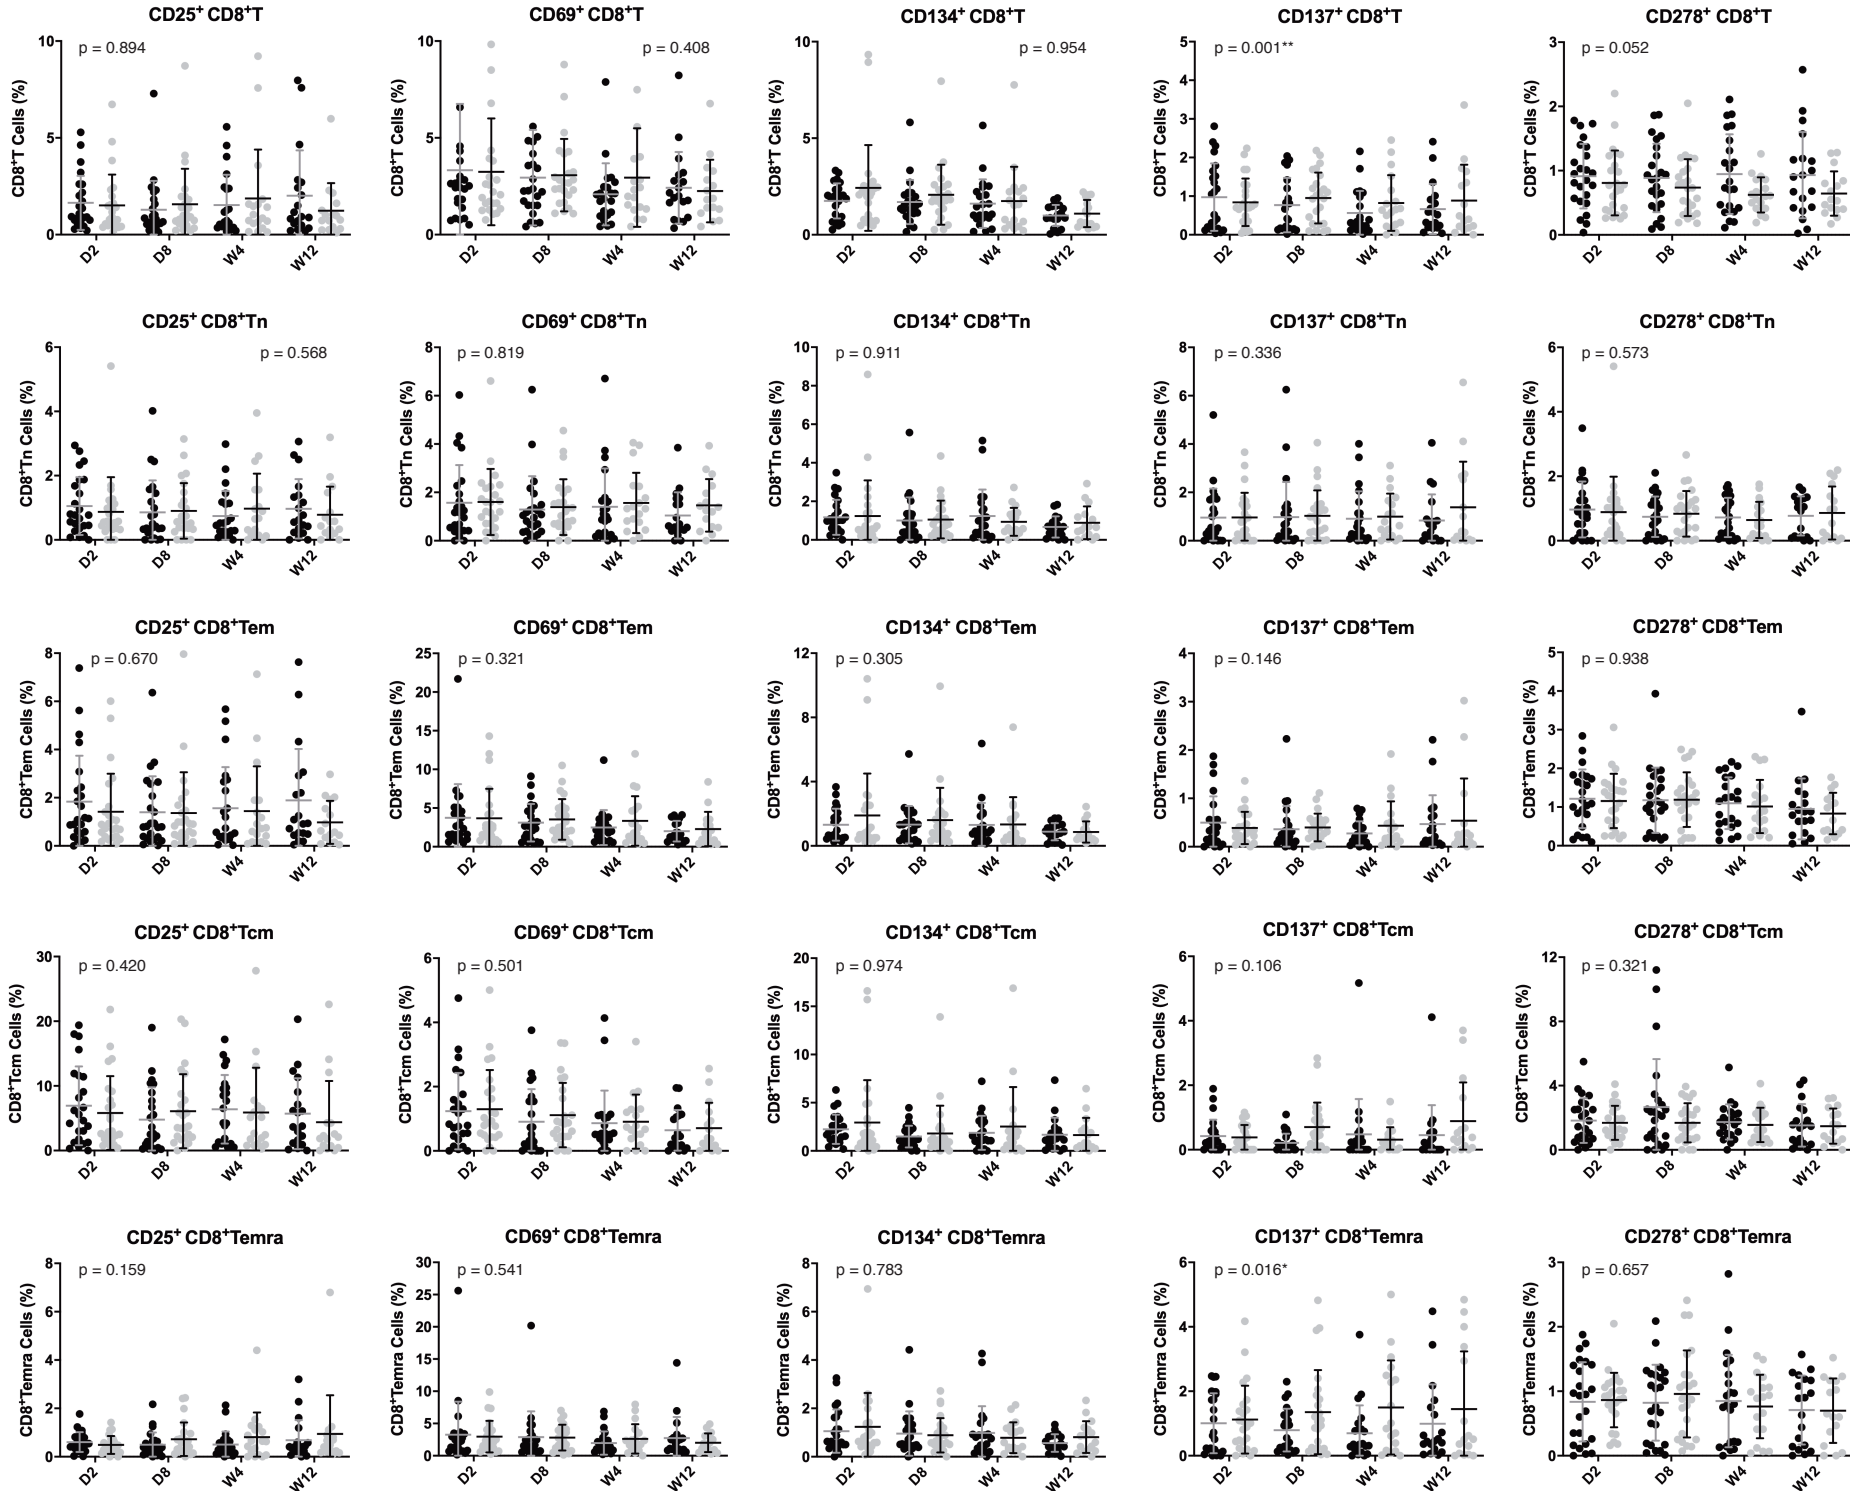

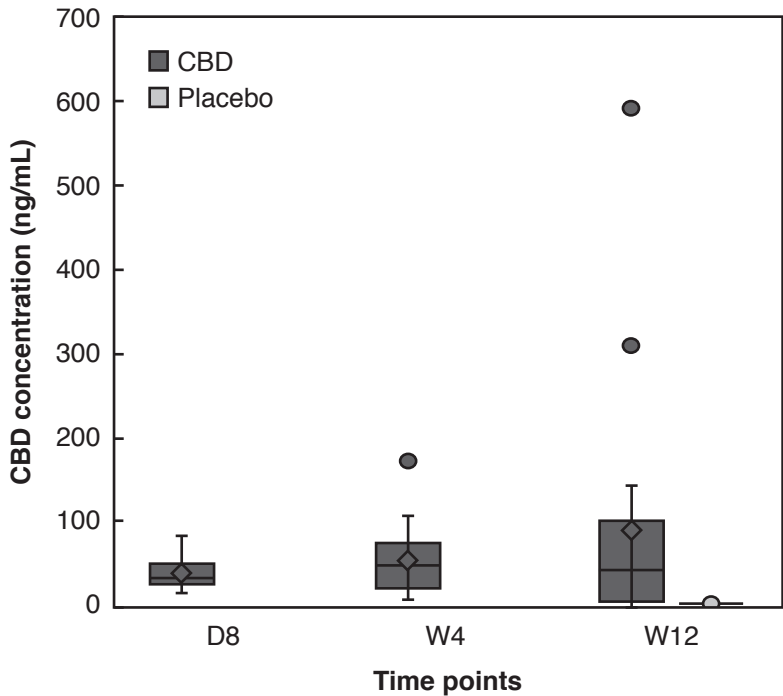

**Table S1. List of monoclonal antibodies.**

| Marker | Clone    | Fluorochrome    | Company        |
|--------|----------|-----------------|----------------|
| CD3    | UCHT1    | BUV395          | BD Biosciences |
| CD3    | UCHT1    | APC-R700        | BD Biosciences |
| CD3    | UCHT1    | FITC            | BD Biosciences |
| CD4    | RPA-T4   | FITC            | BD Biosciences |
| CD8    | SK1      | APC-H7          | BD Biosciences |
| CD11b  | ICRF44   | APC-Cy7         | BD Biosciences |
| CD11b  | ICRF44   | V450            | BD Biosciences |
| CD11c  | B-ly6    | V450            | BD Biosciences |
| CD14   | M5E2     | PerCPCy5.5      | BD Biosciences |
| CD14   | M5E2     | FITC            | BD Biosciences |
| CD16   | 3G8      | PE-CF594        | BD Biosciences |
| CD19   | HIB21    | PE              | BD Biosciences |
| CD19   | HIB21    | PerCPCy5.5      | BD Biosciences |
| CD20   | 2H7      | APC-H7          | BD Biosciences |
| CD24   | ML5      | PE-Cy7          | BD Biosciences |
| CD25   | NCAM16.2 | APC-R700        | BD Biosciences |
| CD27   | M-T271   | Alexa Fluor 700 | BD Biosciences |
| CD33   | WM53     | APC             | BD Biosciences |
| CD38   | HIT2     | PE              | BD Biosciences |
| CD43   | 1G10     | APC             | BD Biosciences |
| CD45RA | HI100    | PerCPCy5.5      | BD Biosciences |
| CD56   | NCAM16.2 | FITC            | BD Biosciences |
| CD62L  | DREG-56  | BV421           | BD Biosciences |
| CD69   | FN50     | BV786           | BD Biosciences |
| CD134  | ACT35    | PE-CF594        | BD Biosciences |
| CD137  | 4B4-1    | APC             | BD Biosciences |
| CD278  | DX29     | PE              | BD Biosciences |
| HLA-DR | G46-6    | PE-Cy7          | BD Biosciences |
| IgD    | IA6-2    | PE-CF594        | BD Biosciences |

CD, cluster of differentiation; HLA-DR, human leukocyte antigen-DR isotype; Ig, immunoglobulin.

**Table S2. Peripheral soluble cytokines and chemokines receptors used.**

| Chemokine Panel 1 | Proinflammatory Panel 1 | Cytokine Panel 1 |
|-------------------|-------------------------|------------------|
| MIP-1 $\beta$     | IL-6                    | IL-16            |
| MDC               |                         | VEGF-A           |

MDC, macrophage derived chemokine; MIP-1 $\beta$ , macrophage inflammatory protein-1 $\beta$ ; IL, interleukine; VEGF-A, vascular endothelial growth factor-A.

**Table S3. Cytokine results.**

| Outcomes      | Parameters | Estimate  | Standard Error | Wald Chi square | p            | Effect size |
|---------------|------------|-----------|----------------|-----------------|--------------|-------------|
| IL-6          | Intercept  | -0.490    | 0.685          | 0.511           | 0.475        |             |
|               | Treatment  | -0.392    | 0.165          | 5.674           | <b>0.017</b> | 0.347       |
|               | Baseline   | -0.993    | 0.095          | 108.968         | <b>0.000</b> |             |
|               | SDS score  | 0.045     | 0.041          | 1.211           | 0.271        |             |
|               | Sex        | -0.341    | 0.238          | 2.054           | 0.152        |             |
|               | Age        | 0.005     | 0.009          | 0.343           | 0.558        |             |
| IL-16         | Intercept  | -180.902  | 56.445         | 10.272          | <b>0.001</b> |             |
|               | Treatment  | 2.448     | 17.133         | 0.020           | 0.886        | 0.021       |
|               | Baseline   | -1.015    | 0.044          | 543.877         | <b>0.000</b> |             |
|               | SDS score  | 2.507     | 3.439          | 0.531           | 0.466        |             |
|               | Sex        | 19.886    | 20.454         | 0.945           | 0.331        |             |
|               | Age        | 1.754     | 0.639          | 7.535           | <b>0.006</b> |             |
| MIP-1 $\beta$ | Intercept  | -87.314   | 24.840         | 12.356          | <b>0.000</b> |             |
|               | Treatment  | 13.746    | 7.565          | 3.301           | 0.069        | 0.265       |
|               | Baseline   | -0.608    | 0.117          | 27.062          | <b>0.000</b> |             |
|               | SDS score  | 1.865     | 1.298          | 2.065           | 0.151        |             |
|               | Sex        | 8.002     | 11.870         | 0.454           | 0.500        |             |
|               | Age        | 0.270     | 0.321          | 0.704           | 0.401        |             |
| MDC           | Intercept  | -1404.405 | 291.097        | 23.276          | <b>0.000</b> |             |
|               | Treatment  | 65.980    | 70.328         | 0.880           | 0.348        | 0.137       |
|               | Baseline   | -0.611    | 0.091          | 44.589          | <b>0.000</b> |             |
|               | SDS score  | -3.439    | 14.564         | 0.056           | 0.813        |             |
|               | Sex        | 76.750    | 89.650         | 0.733           | 0.392        |             |
|               | Age        | 12.242    | 2.954          | 17.174          | <b>0.000</b> |             |
| VEGF-A        | Intercept  | -48.964   | 34.636         | 1.998           | 0.157        |             |
|               | Treatment  | -14.417   | 6.722          | 4.600           | <b>0.032</b> | 0.313       |
|               | Baseline   | -0.567    | 0.163          | 12.130          | <b>0.000</b> |             |
|               | SDS score  | 0.000     | 1.245          | 0.000           | 1.000        |             |
|               | Sex        | -6.442    | 11.633         | 0.307           | 0.580        |             |
|               | Age        | 0.390     | 0.343          | 1.293           | 0.255        |             |

IL, interleukin; MDC, macrophage derived chemokine; MIP-1 $\beta$ , macrophage inflammatory protein-1 $\beta$ ; p, p-value; SDS, severity of dependence scale; VEGF-A, vascular endothelial growth factor-A.

**Table S4. Monocyte results.**

| Outcomes                                                        | Parameters | Estimate | Standard Error | Wald Chi square | p            | Effect size |
|-----------------------------------------------------------------|------------|----------|----------------|-----------------|--------------|-------------|
| Total monocytes CD11c <sup>+</sup>                              | Intercept  | -13.858  | 7.572          | 3.349           | 0.067        | 0.134       |
|                                                                 | Treatment  | -1.547   | 1.682          | 0.845           | 0.358        |             |
|                                                                 | Baseline   | -0.726   | 0.105          | 47.605          | <b>0.000</b> |             |
|                                                                 | SDS score  | 0.362    | 0.317          | 1.304           | 0.254        |             |
|                                                                 | Sex        | -0.829   | 2.316          | 0.128           | 0.720        |             |
|                                                                 | Age        | 0.078    | 0.082          | 0.906           | 0.341        |             |
| Classical monocytes (CD14 <sup>+</sup> CD16 <sup>-</sup> )      | Intercept  | -10.500  | 5.933          | 3.132           | 0.077        | 0.127       |
|                                                                 | Treatment  | -1.460   | 1.677          | 0.758           | 0.384        |             |
|                                                                 | Baseline   | -0.713   | 0.107          | 44.428          | <b>0.000</b> |             |
|                                                                 | SDS score  | 0.275    | 0.276          | 0.991           | 0.319        |             |
|                                                                 | Sex        | -1.126   | 1.891          | 0.355           | 0.551        |             |
|                                                                 | Age        | 0.063    | 0.070          | 0.794           | 0.373        |             |
| Intermediate monocytes (CD14 <sup>+</sup> CD16 <sup>+</sup> )   | Intercept  | -0.032   | 1.036          | 0.001           | 0.975        | 0.330       |
|                                                                 | Treatment  | -0.468   | 0.207          | 5.082           | <b>0.024</b> |             |
|                                                                 | Baseline   | -0.552   | 0.122          | 20.371          | <b>0.000</b> |             |
|                                                                 | SDS score  | 0.055    | 0.060          | 0.852           | 0.356        |             |
|                                                                 | Sex        | -0.081   | 0.288          | 0.078           | 0.780        |             |
|                                                                 | Age        | -0.017   | 0.010          | 2.644           | 0.104        |             |
| Non-classical monocytes (CD14 <sup>lo</sup> CD16 <sup>+</sup> ) | Intercept  | -0.962   | 0.358          | 7.230           | <b>0.007</b> | 0.187       |
|                                                                 | Treatment  | 0.127    | 0.099          | 1.659           | 0.198        |             |
|                                                                 | Baseline   | -0.896   | 0.022          | 1687.591        | <b>0.000</b> |             |
|                                                                 | SDS score  | 0.045    | 0.023          | 3.795           | 0.051        |             |
|                                                                 | Sex        | 0.049    | 0.124          | 0.153           | 0.696        |             |
|                                                                 | Age        | 0.005    | 0.004          | 1.366           | 0.242        |             |
| DC                                                              | Intercept  | -2.485   | 0.981          | 6.418           | <b>0.011</b> | 0.100       |
|                                                                 | Treatment  | 0.170    | 0.248          | 0.469           | 0.493        |             |
|                                                                 | Baseline   | -0.769   | 0.084          | 83.387          | <b>0.000</b> |             |
|                                                                 | SDS score  | 0.043    | 0.052          | 0.691           | 0.406        |             |
|                                                                 | Sex        | -0.098   | 0.383          | 0.066           | 0.798        |             |
|                                                                 | Age        | 0.018    | 0.012          | 2.253           | 0.133        |             |
| mDC                                                             | Intercept  | -2.578   | 0.960          | 7.204           | <b>0.007</b> | 0.213       |
|                                                                 | Treatment  | 0.337    | 0.231          | 2.127           | 0.145        |             |
|                                                                 | Baseline   | -0.774   | 0.102          | 57.113          | <b>0.000</b> |             |
|                                                                 | SDS score  | 0.019    | 0.043          | 0.204           | 0.652        |             |
|                                                                 | Sex        | 0.351    | 0.258          | 1.842           | 0.175        |             |
|                                                                 | Age        | 0.018    | 0.012          | 2.122           | 0.145        |             |
| mMDSC                                                           | Intercept  | 0.316    | 0.303          | 1.085           | 0.298        | 0.031       |
|                                                                 | Treatment  | -0.026   | 0.123          | 0.045           | 0.833        |             |
|                                                                 | Baseline   | -0.403   | 0.196          | 4.216           | <b>0.040</b> |             |
|                                                                 | SDS score  | 0.011    | 0.017          | 0.406           | 0.524        |             |
|                                                                 | Sex        | -0.149   | 0.209          | 0.507           | 0.476        |             |
|                                                                 | Age        | -0.010   | 0.004          | 6.465           | <b>0.011</b> |             |
| gMDSC                                                           | Intercept  | 0.334    | 0.762          | 0.193           | 0.661        | 0.034       |
|                                                                 | Treatment  | 0.030    | 0.128          | 0.053           | 0.818        |             |
|                                                                 | Baseline   | -0.766   | 0.135          | 32.037          | <b>0.000</b> |             |
|                                                                 | SDS score  | 0.022    | 0.026          | 0.681           | 0.409        |             |
|                                                                 | Sex        | -0.320   | 0.253          | 1.599           | 0.206        |             |
|                                                                 | Age        | -0.011   | 0.007          | 2.579           | 0.108        |             |

CD, cluster of differentiation; DC, dendritic cells; gMDSC, granulocytic myeloid derived suppressor cells; mDC, myeloid dendritic cells; mMDSC, monocytic myeloid derived suppressor cells; p, p-value; SDS, severity of dependence scale.



**Table S5. Lymphocyte results.**

| Outcomes                                  | Parameters | Estimate | Standard Error | Wald Chi square | p            | Effect size |
|-------------------------------------------|------------|----------|----------------|-----------------|--------------|-------------|
| Total NK                                  | Intercept  | -4.794   | 3.029          | 2.505           | 0.113        | 0.210       |
|                                           | Treatment  | -1.003   | 0.698          | 2.062           | 0.151        |             |
|                                           | Baseline   | -0.774   | 0.124          | 38.949          | <b>0.000</b> |             |
|                                           | SDS score  | 0.125    | 0.154          | 0.660           | 0.417        |             |
|                                           | Sex        | 0.916    | 0.805          | 1.297           | 0.255        |             |
|                                           | Age        | 0.015    | 0.034          | 0.194           | 0.660        |             |
| NK CD56 <sup>dim</sup> CD16 <sup>hi</sup> | Intercept  | -3.435   | 2.583          | 1.768           | 0.184        | 0.060       |
|                                           | Treatment  | -0.254   | 0.618          | 0.168           | 0.681        |             |
|                                           | Baseline   | -0.899   | 0.145          | 38.184          | <b>0.000</b> |             |
|                                           | SDS score  | 0.064    | 0.147          | 0.186           | 0.666        |             |
|                                           | Sex        | 0.930    | 0.677          | 1.888           | 0.169        |             |
|                                           | Age        | 0.010    | 0.025          | 0.165           | 0.685        |             |
| NK CD56 <sup>hi</sup> CD16 <sup>neg</sup> | Intercept  | -0.351   | 0.209          | 2.818           | 0.093        | 0.247       |
|                                           | Treatment  | 0.088    | 0.052          | 2.804           | 0.094        |             |
|                                           | Baseline   | -0.502   | 0.134          | 14.143          | <b>0.000</b> |             |
|                                           | SDS score  | -0.016   | 0.011          | 2.226           | 0.136        |             |
|                                           | Sex        | 0.090    | 0.050          | 3.282           | 0.070        |             |
|                                           | Age        | 0.004    | 0.003          | 2.296           | 0.130        |             |
| NK CD56 <sup>neg</sup> CD16 <sup>hi</sup> | Intercept  | -0.899   | 0.817          | 1.211           | 0.271        | 0.643       |
|                                           | Treatment  | -0.736   | 0.167          | 19.552          | <b>0.000</b> |             |
|                                           | Baseline   | -0.430   | 0.072          | 35.759          | <b>0.000</b> |             |
|                                           | SDS score  | 0.033    | 0.030          | 1.169           | 0.280        |             |
|                                           | Sex        | 0.058    | 0.208          | 1.169           | 0.782        |             |
|                                           | Age        | 0.003    | 0.012          | 0.064           | 0.800        |             |
| Total B cells                             | Intercept  | -2.136   | 2.534          | 0.711           | 0.399        | 0.123       |
|                                           | Treatment  | -0.490   | 0.579          | 0.716           | 0.397        |             |
|                                           | Baseline   | -0.457   | 0.069          | 44.359          | <b>0.000</b> |             |
|                                           | SDS score  | -0.015   | 0.100          | 0.023           | 0.879        |             |
|                                           | Sex        | -1.245   | 0.701          | 3.155           | 0.076        |             |
|                                           | Age        | -0.004   | 0.032          | 0.014           | 0.906        |             |
| Early B cells                             | Intercept  | -7.950   | 4.807          | 2.735           | 0.098        | 0.221       |
|                                           | Treatment  | -2.010   | 1.329          | 2.287           | 0.130        |             |
|                                           | Baseline   | -0.875   | 0.056          | 241.367         | <b>0.000</b> |             |
|                                           | SDS score  | 0.156    | 0.230          | 0.462           | 0.497        |             |
|                                           | Sex        | -1.025   | 1.373          | 0.557           | 0.455        |             |
|                                           | Age        | -0.013   | 0.036          | 0.130           | 0.719        |             |
| Late B cells                              | Intercept  | -4.250   | 4.050          | 1.101           | 0.294        | 0.232       |
|                                           | Treatment  | 2.088    | 1.313          | 2.529           | 0.112        |             |
|                                           | Baseline   | -0.874   | 0.056          | 245.400         | <b>0.000</b> |             |
|                                           | SDS score  | -0.159   | 0.233          | 0.469           | 0.494        |             |
|                                           | Sex        | 1.055    | 1.342          | 0.617           | 0.432        |             |
|                                           | Age        | 0.007    | 0.035          | 0.043           | 0.835        |             |
| Total T cells                             | Intercept  | -10.539  | 10.037         | 1.103           | 0.294        | 0.117       |
|                                           | Treatment  | 1.595    | 1.982          | 0.648           | 0.421        |             |
|                                           | Baseline   | -0.690   | 0.089          | 59.481          | <b>0.000</b> |             |
|                                           | SDS score  | -0.091   | 0.382          | 0.057           | 0.812        |             |
|                                           | Sex        | 1.173    | 2.606          | 0.203           | 0.653        |             |
|                                           | Age        | -0.110   | 0.096          | 1.305           | 0.253        |             |
| CD4 <sup>+</sup> T                        | Intercept  | 3.540    | 5.118          | 0.479           | 0.489        | 0.131       |
|                                           | Treatment  | 1.101    | 1.222          | 0.812           | 0.368        |             |
|                                           | Baseline   | -0.901   | 0.048          | 355.014         | <b>0.000</b> |             |
|                                           | SDS score  | -0.507   | 0.273          | 3.441           | 0.064        |             |
|                                           | Sex        | -0.322   | 1.180          | 0.075           | 0.785        |             |
|                                           | Age        | -0.064   | 0.053          | 1.445           | 0.229        |             |
| CD8 <sup>+</sup> T                        | Intercept  | -10.415  | 4.383          | 5.646           | <b>0.017</b> | 0.238       |
|                                           | Treatment  | 1.840    | 1.130          | 2.653           | 0.103        |             |
|                                           | Baseline   | -0.942   | 0.047          | 394.806         | <b>0.000</b> |             |
|                                           | SDS score  | 0.459    | 0.261          | 3.097           | 0.078        |             |
|                                           | Sex        | -0.266   | 1.053          | 0.064           | 0.801        |             |
|                                           | Age        | 0.028    | 0.045          | 0.386           | 0.534        |             |

CD, cluster of differentiation; NK, natural killer; p, p-value; SDS, severity of dependence scale.

**Table S8. Anti-inflammatory drugs used by participants at least once during the trial.**

| Anti-inflammatory drugs, n (%)       | Treatment group |                |
|--------------------------------------|-----------------|----------------|
|                                      | CBD (n=24)      | Placebo (n=24) |
| Inhaled corticosteroid               | 1 (4.2)         | 2 (8.3)        |
| Topical corticosteroid               | 2 (8.3)         | 3 (12.5)       |
| Nasal corticosteroid spray           | 2 (8.3)         | 0 (0.0)        |
| Oral corticosteroid                  | 0 (0.0)         | 0 (0.0)        |
| Nonsteroidal anti-inflammatory drugs | 3 (12.5)        | 3 (12.5)       |
| Monoclonal antibody therapy          | 0 (0.0)         | 1 (4.2)        |
| Total*                               | 6 (25.0)        | 6 (25.0)       |

\*Some participants took many anti-inflammatory drugs which explains why the total does not correspond to the sum. CBD, cannabidiol; n, number of participants.

**Table S9. Sensitivity analysis without participants taking anti-inflammatory drugs.**

| Outcomes                                                      | Parameters                                                    | Estimate | Standard Error | Wald Chi square | p            | Effect size |
|---------------------------------------------------------------|---------------------------------------------------------------|----------|----------------|-----------------|--------------|-------------|
| IL-6                                                          | Treatment                                                     | -0.392   | 0.165          | 5.674           | <b>0.017</b> | 0.347       |
|                                                               | Treatment without participants taking anti-inflammatory drugs | -0.466   | 0.161          | 8.402           | <b>0.004</b> | 0.423       |
| VEGF-A                                                        | Treatment                                                     | -14.417  | 6.722          | 4.600           | <b>0.032</b> | 0.313       |
|                                                               | Treatment without participants taking anti-inflammatory drugs | -12.146  | 9.376          | 1.678           | 0.195        | 0.189       |
| Intermediate monocytes (CD14 <sup>+</sup> CD16 <sup>+</sup> ) | Treatment                                                     | -0.468   | 0.207          | 5.082           | <b>0.024</b> | 0.330       |
|                                                               | Treatment without participants taking anti-inflammatory drugs | -0.258   | 0.213          | 1.470           | 0.225        | 0.177       |
| NK CD56 <sup>neg</sup> CD16 <sup>hi</sup>                     | Treatment                                                     | -0.736   | 0.167          | 19.552          | <b>0.000</b> | 0.643       |
|                                                               | Treatment without participants taking anti-inflammatory drugs | -0.673   | 0.182          | 13.682          | <b>0.000</b> | 0.539       |
| CD25 <sup>+</sup> CD4 <sup>+</sup> T                          | Treatment                                                     | 0.689    | 0.256          | 7.220           | <b>0.007</b> | 0.393       |
|                                                               | Treatment without participants taking anti-inflammatory drugs | 0.511    | 0.308          | 2.760           | 0.097        | 0.242       |

CD, cluster of differentiation; IL, interleukine; NK, natural killer; p, p-value; VEGF-A, vascular endothelial growth factor-A.

**Table S10. Sensitivity analysis with anti-inflammatory drug use added as a binary covariate.**

| Outcomes                                                         | Parameters                 | Estimate | Standard Error | Wald Chi square | p            | Effect size |
|------------------------------------------------------------------|----------------------------|----------|----------------|-----------------|--------------|-------------|
| IL-6                                                             | Intercept                  | -0.480   | 0.697          | 0.475           | 0.342        | 0.346       |
|                                                                  | Treatment                  | -0.392   | 0.165          | 5.608           | <b>0.018</b> |             |
|                                                                  | Baseline                   | -0.993   | 0.094          | 111.527         | <b>0.000</b> |             |
|                                                                  | SDS score                  | 0.045    | 0.040          | 1.283           | 0.257        |             |
|                                                                  | Sex                        | -0.347   | 0.244          | 2.024           | 0.155        |             |
|                                                                  | Age                        | 0.005    | 0.008          | 0.347           | 0.556        |             |
|                                                                  | Anti-inflammatory drug use | 0.023    | 0.240          | 0.009           | 0.923        |             |
| VEGF-A                                                           | Intercept                  | -47.149  | 33.890         | 1.936           | 0.164        | 0.311       |
|                                                                  | Treatment                  | -14.462  | 6.792          | 4.535           | <b>0.033</b> |             |
|                                                                  | Baseline                   | -0.564   | 0.160          | 12.497          | <b>0.000</b> |             |
|                                                                  | SDS score                  | 0.025    | 1.254          | 0.000           | 0.984        |             |
|                                                                  | Sex                        | -7.540   | 12.204         | 0.382           | 0.537        |             |
|                                                                  | Age                        | 0.342    | 0.339          | 1.018           | 0.313        |             |
|                                                                  | Anti-inflammatory drug use | 4.370    | 8.145          | 0.288           | 0.592        |             |
| Intermediate monocytes<br>(CD14 <sup>+</sup> CD16 <sup>+</sup> ) | Intercept                  | -0.006   | 1.024          | 0.000           | 0.996        | 0.330       |
|                                                                  | Treatment                  | -0.467   | 0.207          | 5.111           | <b>0.024</b> |             |
|                                                                  | Baseline                   | -0.554   | 0.124          | 19.946          | <b>0.000</b> |             |
|                                                                  | SDS score                  | 0.056    | 0.060          | 0.862           | 0.353        |             |
|                                                                  | Sex                        | -0.097   | 0.297          | 0.107           | 0.744        |             |
|                                                                  | Age                        | -0.017   | 0.010          | 2.984           | 0.084        |             |
|                                                                  | Anti-inflammatory drug use | 0.090    | 0.202          | 0.200           | 0.655        |             |
| NK CD56 <sup>neg</sup> CD16 <sup>hi</sup>                        | Intercept                  | -0.928   | 0.820          | 1.279           | 0.258        | 0.649       |
|                                                                  | Treatment                  | -0.736   | 0.166          | 19.784          | <b>0.000</b> |             |
|                                                                  | Baseline                   | -0.427   | 0.073          | 34.490          | <b>0.000</b> |             |
|                                                                  | SDS score                  | 0.032    | 0.030          | 1.132           | 0.287        |             |
|                                                                  | Sex                        | 0.075    | 0.211          | 0.128           | 0.720        |             |
|                                                                  | Age                        | 0.004    | 0.012          | 0.096           | 0.757        |             |
|                                                                  | Anti-inflammatory drug use | -0.074   | 0.158          | 0.218           | 0.641        |             |
| CD25 <sup>+</sup> CD4 <sup>+</sup> T                             | Intercept                  | -2.456   | 0.801          | 9.397           | <b>0.002</b> | 0.386       |
|                                                                  | Treatment                  | 0.685    | 0.259          | 6.999           | <b>0.008</b> |             |
|                                                                  | Baseline                   | -0.759   | 0.069          | 120.789         | <b>0.000</b> |             |
|                                                                  | SDS score                  | 0.035    | 0.051          | 0.467           | 0.494        |             |
|                                                                  | Sex                        | 0.164    | 0.366          | 0.202           | 0.653        |             |
|                                                                  | Age                        | 0.016    | 0.010          | 2.471           | 0.116        |             |
|                                                                  | Anti-inflammatory drug use | -0.114   | 0.285          | 0.161           | 0.688        |             |

CD, cluster of differentiation; IL, interleukine; NK, natural killer; p, p-value; SDS, severity of dependence scale; VEGF-A, vascular endothelial growth factor-A.

**Table S11. Correlations between weight and inflammatory markers levels.**

| Inflammatory markers                      | Pearson r | t      | df | p            |
|-------------------------------------------|-----------|--------|----|--------------|
| IL-6                                      | -0.060    | -0.284 | 22 | 0.390        |
| VEGF-A                                    | -0.397    | -2.029 | 22 | <b>0.027</b> |
| Intermediate monocytes                    | -0.198    | -0.949 | 22 | 0.177        |
| NK CD56 <sup>neg</sup> CD16 <sup>hi</sup> | 0.102     | 0.480  | 22 | 0.682        |
| CD25 <sup>+</sup> CD4 <sup>+</sup> T      | 0.149     | 0.706  | 22 | 0.756        |

CD, cluster of differentiation; df, degree of freedom; IL, interleukine; NK, natural killer; p, p-value; r, correlation coefficient; t, Student t; VEGF-A, vascular endothelial growth factor-A.

**Table S12. Correlations between cannabidiol plasma concentration and inflammatory markers levels.**

| Inflammatory markers                      | Pearson r | t      | df | p     |
|-------------------------------------------|-----------|--------|----|-------|
| IL-6                                      | -0.032    | -0.148 | 22 | 0.442 |
| VEGF-A                                    | 0.041     | 0.191  | 22 | 0.575 |
| Intermediate monocytes                    | 0.199     | 0.951  | 22 | 0.824 |
| NK CD56 <sup>neg</sup> CD16 <sup>hi</sup> | -0.134    | -0.634 | 22 | 0.266 |
| CD25 <sup>+</sup> CD4 <sup>+</sup> T      | -0.199    | -0.954 | 22 | 0.175 |

CD, cluster of differentiation; df, degree of freedom; IL, interleukine; NK, natural killer; p, p-value; r, correlation coefficient; VEGF-A, vascular endothelial growth factor-A.

**Table S13. Linear regressions analysis of inflammatory markers on drug-cue induced craving by treatment group.**

| Model                                          | Variables                                           | Estimate | Standard Error | t      | p     |
|------------------------------------------------|-----------------------------------------------------|----------|----------------|--------|-------|
| IL-6                                           | Intercept                                           | 3.498    | 3.621          | 0.966  | 0.340 |
|                                                | Treatment                                           | -0.823   | 1.577          | -0.522 | 0.604 |
|                                                | IL-6                                                | 0.838    | 0.887          | 0.944  | 0.351 |
|                                                | Baseline                                            | -1.217   | 0.746          | -1.632 | 0.111 |
|                                                | SDS score                                           | -0.108   | 0.187          | -0.576 | 0.568 |
|                                                | Sex                                                 | 0.962    | 1.181          | 0.814  | 0.420 |
|                                                | Age                                                 | 0.017    | 0.042          | 0.408  | 0.686 |
|                                                | Treatment*IL-6                                      | 1.118    | 0.980          | 1.140  | 0.261 |
| VEGF-A                                         | Intercept                                           | 4.550    | 3.689          | 1.233  | 0.225 |
|                                                | Treatment                                           | 2.383    | 2.753          | 0.865  | 0.392 |
|                                                | VEGF-A                                              | -0.005   | 0.018          | -0.308 | 0.760 |
|                                                | Baseline                                            | 0.014    | 0.015          | 0.947  | 0.349 |
|                                                | SDS score                                           | -0.133   | 0.199          | -0.669 | 0.508 |
|                                                | Sex                                                 | 0.028    | 1.441          | 0.019  | 0.985 |
|                                                | Age                                                 | -0.008   | 0.047          | -0.166 | 0.869 |
| Treatment*VEGF-A                               | -0.018                                              | 0.025    | -0.728         | 0.471  |       |
| Intermediate monocytes                         | Intercept                                           | 5.066    | 3.766          | 1.345  | 0.186 |
|                                                | Treatment                                           | 1.358    | 1.344          | 1.010  | 0.318 |
|                                                | Intermediate monocytes                              | 0.218    | 0.484          | 0.451  | 0.655 |
|                                                | Baseline                                            | 0.339    | 0.515          | 0.658  | 0.514 |
|                                                | SDS score                                           | -0.139   | 0.196          | -0.708 | 0.483 |
|                                                | Sex                                                 | -0.053   | 1.353          | -0.039 | 0.969 |
|                                                | Age                                                 | -0.016   | 0.046          | -0.339 | 0.737 |
|                                                | Treatment*Intermediate monocytes                    | -0.398   | 0.803          | -0.495 | 0.623 |
| NK CD56 <sup>neg</sup> CD16 <sup>hi</sup>      | Intercept                                           | 4.100    | 3.814          | 1.075  | 0.289 |
|                                                | Treatment                                           | -0.140   | 1.808          | -0.078 | 0.939 |
|                                                | NK CD56 <sup>neg</sup> CD16 <sup>hi</sup>           | -0.362   | 0.925          | -0.391 | 0.698 |
|                                                | Baseline                                            | 0.032    | 0.535          | 0.061  | 0.952 |
|                                                | SDS score                                           | -0.114   | 0.205          | -0.555 | 0.582 |
|                                                | Sex                                                 | 0.739    | 1.241          | 0.595  | 0.555 |
|                                                | Age                                                 | 0.009    | 0.045          | 0.196  | 0.845 |
|                                                | Treatment*NK CD56 <sup>neg</sup> CD16 <sup>hi</sup> | 0.660    | 1.233          | 0.536  | 0.595 |
| CD25 <sup>+</sup> CD4 <sup>+</sup> T           | Intercept                                           | 3.345    | 4.000          | 0.836  | 0.408 |
|                                                | Treatment                                           | 1.231    | 1.764          | 0.698  | 0.489 |
|                                                | CD25 <sup>+</sup> CD4 <sup>+</sup> T                | -0.639   | 0.520          | -1.230 | 0.226 |
|                                                | Baseline                                            | 0.523    | 0.355          | 1.475  | 0.148 |
|                                                | SDS score                                           | -0.096   | 0.192          | -0.499 | 0.620 |
|                                                | Sex                                                 | 0.833    | 1.212          | 0.687  | 0.496 |
|                                                | Age                                                 | 0.007    | 0.044          | 0.152  | 0.880 |
| Treatment*CD25 <sup>+</sup> CD4 <sup>+</sup> T | 0.075                                               | 0.429    | 0.174          | 0.863  |       |

The dependent variable for all models was the difference between pre and post self-reported drug-cue induced craving scores (using a visual analogue scale ranging from 0 to 10). The five main significant inflammatory markers by treatment group were the independent variables in their respective model. Baseline inflammatory marker's level, SDS score, sex and age were added as covariates in all models. CD, cluster of differentiation; IL, interleukine; NK, natural killer; p, p-value; SDS, severity of dependence scale; t, Student t; VEGF-A, vascular endothelial growth factor-A.
